# Supplementary material
Source: MDPI journal article supplement (https://www.mdpi.com/2813-0618/2/4/29)
Supplement: s1 [file s1]

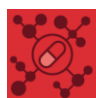

Table S1. Search strings, executed on January 11, 2023.

| # | Concept                                                                        | Details                                                                                                                                                                                                                                                                                                                                                                                                                                                                                                                                                                                                                                                                                                                                                                                                                                                                                                                                           | Number of Hits |
|---|--------------------------------------------------------------------------------|---------------------------------------------------------------------------------------------------------------------------------------------------------------------------------------------------------------------------------------------------------------------------------------------------------------------------------------------------------------------------------------------------------------------------------------------------------------------------------------------------------------------------------------------------------------------------------------------------------------------------------------------------------------------------------------------------------------------------------------------------------------------------------------------------------------------------------------------------------------------------------------------------------------------------------------------------|----------------|
| 1 | Medications: commonly used CYP3A4 inhibiting anti-infectives                   | ("clarithromycin"[Title/Abstract] OR "erythromycin"[Title/Abstract] OR "itraconazole"[Title/Abstract] OR "fluconazole"[Title/Abstract] OR "ketoconazole"[Title/Abstract] OR "posaconazole"[Title/Abstract] OR "ciprofloxacin"[Title/Abstract] OR "levofloxacin"[Title/Abstract] OR "ofloxacin"[Title/Abstract])                                                                                                                                                                                                                                                                                                                                                                                                                                                                                                                                                                                                                                   | 96,667         |
| 2 | Observational studies                                                          | AND ("observational study"[Publication Type] OR "observational"[Text Word] OR "real world"[Text Word] OR "cohort studies"[MeSH Terms] OR ("cohort"[Text Word] AND ("study"[Text Word] OR "studies"[Text Word])) OR "prospective"[Text Word] OR "retrospective"[Text Word] OR "longitudinal"[Text Word] OR "case-control studies"[MeSH Terms] OR ("case control"[Text Word] AND ("study"[Text Word] OR "studies"[Text Word])) OR "administrative claims, healthcare"[MeSH Terms] OR ("claims"[Text Word] AND "data*"[Text Word]) OR "medical records systems, computerized"[MeSH Terms] OR ("electronic"[Text Word] AND "record*"[Text Word]) OR "registries"[MeSH Terms] OR "registry"[Text Word] OR "registries"[Text Word])                                                                                                                                                                                                                     | 12,413         |
| 3 | Adverse effects terms                                                          | AND "adverse event*"[All Fields] OR "adverse effect*"[All Fields] OR "adverse effects"[MeSH Subheading] OR "drug related side effects and adverse reactions"[MeSH Terms] OR "serious adverse"[Title/Abstract] OR "SAE"[Title/Abstract] OR "severe adverse"[Title/Abstract] OR "serious event"[Title/Abstract] OR "severe event"[Title/Abstract] OR "severe reaction"[Title/Abstract] OR "safe*"[Title/Abstract] OR "adverse*"[Title/Abstract] OR "side effect*"[Title/Abstract] OR "complication*"[Title/Abstract] OR "tolerated"[Title/Abstract] OR "tolerance"[Title/Abstract] OR "harm*"[Title/Abstract] OR "toxicity"[Title/Abstract] OR "risk"[Title/Abstract] OR "tolerability"[Title/Abstract] OR "drug induced"[Title/Abstract] OR "negative effects"[Title/Abstract] OR "Long Term Adverse Effects"[MeSH Terms] OR "Drug Hypersensitivity"[MeSH Terms] OR "Toxicology"[MeSH Terms] OR "pregnancy complications/drug effects"[MeSH Terms] | 6,136          |
| 4 | Outcomes                                                                       | "hospitalization"[MeSH Terms] OR "hospitals"[MeSH Terms] OR "hospital*"[Text Word] OR "mortality"[MeSH Terms] OR "mortality"[MeSH Subheading] OR "mortalit*"[Text Word] OR "death"[MeSH Terms] OR "death*"[Text Word] OR "disable*"[Text Word] OR "disabilit*"[Text Word] OR "admit*"[Text Word] OR "admission*"[Text Word] OR "emergenc*"[Text Word]                                                                                                                                                                                                                                                                                                                                                                                                                                                                                                                                                                                             | 2,907          |
| 5 | Filters: has abstract, English, humans, 5-year range, published from 2018-2022 | AND "hasabstract"[All Fields] AND "English"[Language] AND 2017/01/01:2023/12/31[Date - Publication]                                                                                                                                                                                                                                                                                                                                                                                                                                                                                                                                                                                                                                                                                                                                                                                                                                               | 838            |

| # | Concept                                                                    | Details                                                                                                                                                                                                                                                                                                                                                                                                                                                                        | Number of Hits |
|---|----------------------------------------------------------------------------|--------------------------------------------------------------------------------------------------------------------------------------------------------------------------------------------------------------------------------------------------------------------------------------------------------------------------------------------------------------------------------------------------------------------------------------------------------------------------------|----------------|
| 6 | Filters: exclude animal studies, case reports, editorials, letters, trials | NOT (("Animals"[MeSH Terms] OR "Animal Experimentation"[MeSH Terms] OR "models, animal"[MeSH Terms] OR "Vertebrates"[MeSH Terms]) NOT ("Humans"[MeSH Terms] OR "Human experimentation"[MeSH Terms]))<br>NOT ("randomized controlled trial"[Publication Type] OR ("randomized"[Title/Abstract] AND "trial"[Title/Abstract]))<br><br>NOT ("case reports"[Publication Type] OR "editorial"[Publication Type] OR "letter"[Publication Type] OR "clinical trial"[Publication Type]) | 754            |
